# Supplementary material for: Individual characteristics moderate listening effort in noisy classrooms
Source: PubMed Central journal article supplement (PMC10471719; doi:10.1038/s41598-023-40660-1), 2023-08-31
Supplement: 41598_2023_40660_MOESM1_ESM.pdf [file 41598_2023_40660_MOESM1_ESM.pdf]

## **SUPPLEMENTARY MATERIAL – R code**

This Supplementary Material reports the R script used for the statistical analysis of the dataset used in the manuscript “Individual characteristics moderate listening effort in noisy classrooms” (Visentin et al., *Sci Rep*, 2023)

The same analytical strategy was adopted for the analysis of response time data and subjective ratings.

### **#### load libraries**

```
library(lme4)
library(afex)
library(dplyr)
library(tidyr)
library(sjPlot)
library(performance)
library(emmeans)
library(ggplot2)
```

### **###import the dataset for accuracy data**

```
library(rstudioapi)
current_path = rstudioapi::getActiveDocumentContext()$path
setwd(dirname(current_path ))

load("Data_schools.RData")
```

### **### data cleaning**

```
# remove timeouts (>15 s)
all_data=subset(all_data,!Timeout=="1")

# remove trials with RT<150 ms
all_data =subset(all_data,!RT<150)

# remove participants without individual measures
sub_data = all_data %>%
  drop_na(noise_sensitivity) %>%
  drop_na(reading_comprehension) %>%
  drop_na(inhibition)
```

### **### recoding levels for each variable**

```
sub_data$noise_sensitivity <- relevel(factor(sub_data$noise_sensitivity), ref="Low")
sub_data$reading_comprehension <- relevel(factor(sub_data $ reading_comprehension), ref="Low ")
sub_data$inhibition <- relevel(factor(sub_data $ inhibition), ref="Low")
sub_data$list_cond <- relevel(factor(sub_data $ list_cond), ref="Hard")
sub_data$complexity <- relevel(factor(sub_data $complexity), ref="Low")
```

### ### statistical model

# maximal model (not converging)

```
mod<-mixed(correct ~ list_cond + complexity + noise_sensitivity + inhibition + reading_comprehension +  
inhibition + list_cond: noise_sensitivity + list_cond: reading_comprehension + list_cond:inhibition+  
(list_cond*complexity | school\class\participant)+(1|item),  
data=sub_data, family=binomial,method='LRT')
```

# full model (no warnings)

```
mod<-mixed(correct ~ list_cond + complexity + noise_sensitivity + inhibition + reading_comprehension +  
inhibition + list_cond: noise_sensitivity + list_cond: reading_comprehension + list_cond:inhibition+  
(list_cond | participant)+(1|item),  
data=sub_data, family=binomial, method='LRT')
```

# base model

```
mod.b<-mixed(correct ~ list_cond +  
(list_cond | participant)+(1|item),  
data=sub_data, family=binomial, method='LRT')
```

# get coefficients of determination

```
r2_nakagawa(mod)  
r2_nakagawa(mod.b)
```

#post-hoc

```
e<-emmeans(mod, "complexity", type = "response")  
pairs(e, adjust = "bonferroni")
```
